# Supplementary material for: Philippine Ayta possess the highest level of Denisovan ancestry in the world
Source: PubMed Central journal article supplement — Curr Biol. 2021 Aug 12;31(19):4219–4230.e10. doi: 10.1016/j.cub.2021.07.022 (PMC8596304; doi:10.1016/j.cub.2021.07.022), 2021-08-12
Supplement: mmc1.pdf [file mmc1.pdf]

## Supplemental Information

### Philippine Ayta possess the highest level of Denisovan ancestry in the world

Maximilian Larena, James McKenna, Federico Sanchez-Quinto, Carolina Bernhardsson, Carlo Ebeo, Rebecca Reyes, Ophelia Casel, Jin-Yuan Huang, Kim Pullupul Hagada, Dennis Guilay, Jennelyn Reyes, Fatima Pir Allian, Virgilio Mori, Lahaina Sue Azarcon, Alma Manera, Celito Terando, Lucio Jamero Jr., Gauden Sireg, Renefe Manginsay-Tremedal, Maria Shiela Labos, Richard Dian Vilar, Acram Latiph, Rodelio Linsahay Saway, Erwin Marte, Pablito Magbanua, Amor Morales, Ismael Java, Rudy Reveche, Becky Barrios, Erlinda Burton, Jesus Christopher Salon, Ma. Junaliah Tuazon Kels, Adrian Albano, Rose Beatrix Cruz-Angeles, Edison Molanida, Lena Granhäll, Mário Vicente, Hanna Edlund, Jun-Hun Loo, Jean Trejaut, Simon Y.W. Ho, Lawrence Reid, Kurt Lambeck, Helena Malmström, Carina Schlebusch, Phillip Endicott, and Mattias Jakobsson

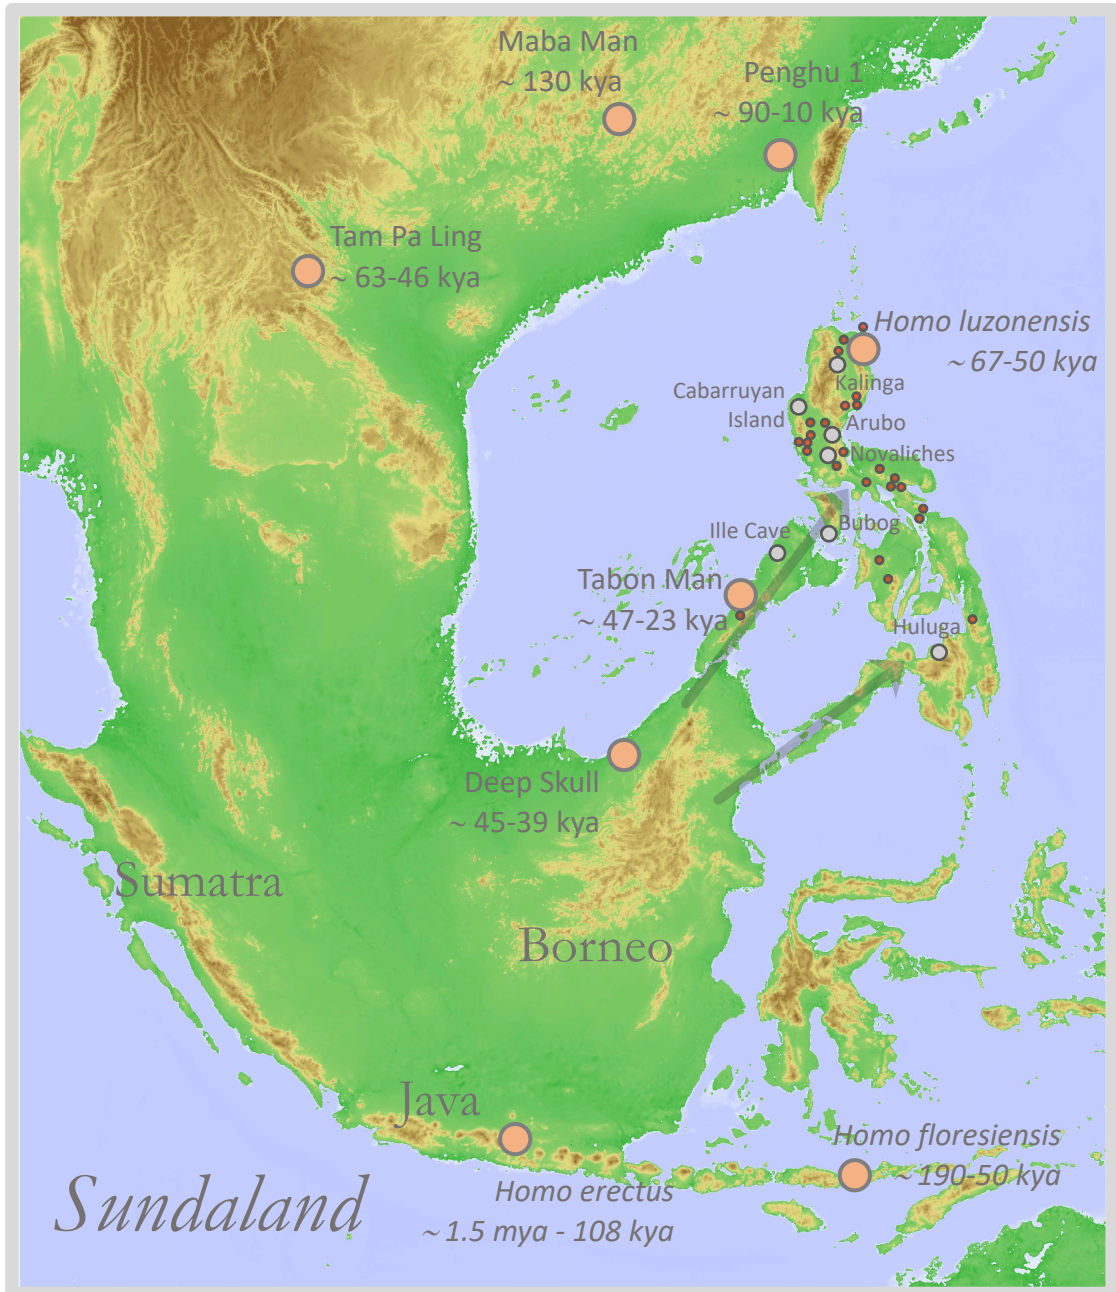

**Figure S1. Paleolithic archaeological sites in the Philippines and the ISEA region, Related to Figure 1.** Reconstructed map of Sundaland 21 kya and the location and chronology of paleolithic human remains discovered in the region (light red circular marker). Location of archeological sites within the Philippines associated with the presence of paleolithic artefacts (small grey circular marker), and location of present-day Negrito ethnic groups included in this study (small bright red circular marker). The arrows indicate the accessible corridors for the migration of populations during the period of maximum glaciation: the northern Palawan-Mindoro corridor and the southern Sulu-Zamboanga corridor.

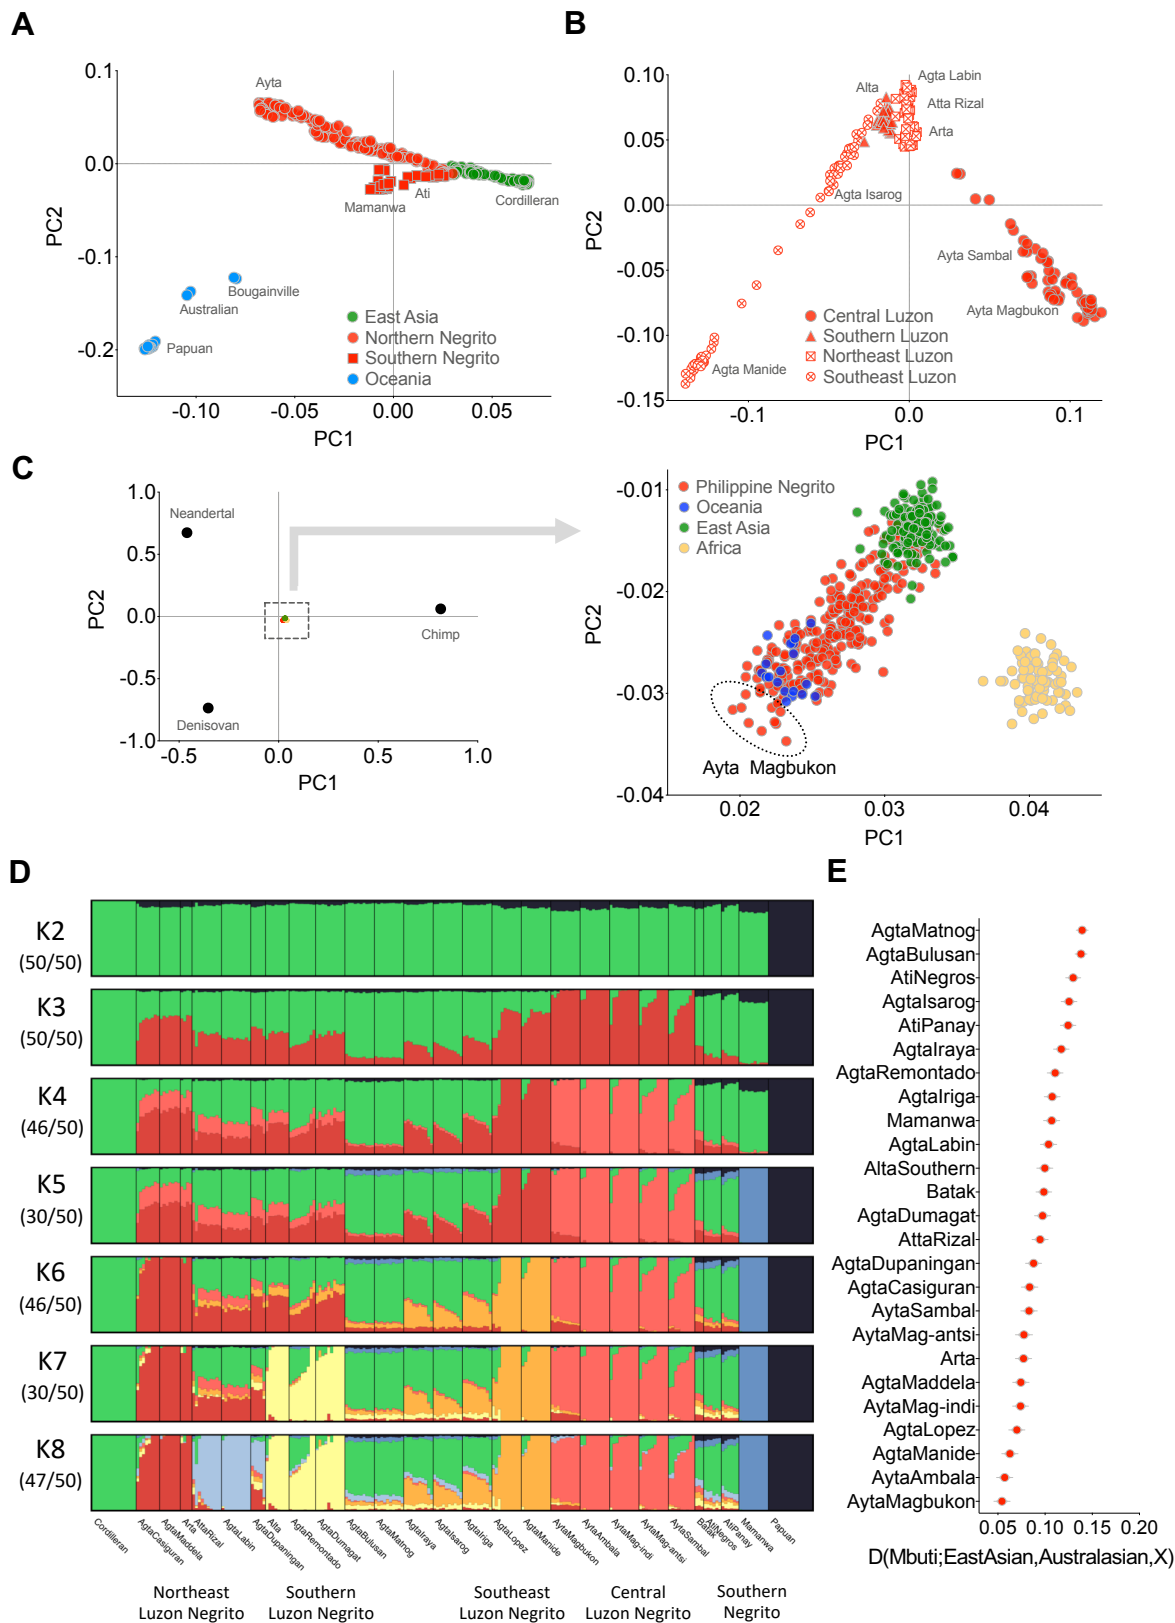

**Figure S2. Genetic affinities and clusters of Philippine Negrito ethnic groups, Related to Figure 1.** Principal Component analysis (PCA) restricted to Australasians and East Asians (**A**), and to Northern Negritos of the Philippines (**B**). PCA applying the least square equations projection (**C**); modern humans are projected onto the first two principal components defined by the Altai Denisovan, Altai Neandertal, and chimpanzee. All modern humans lie at the center of the plot, and an inset panel to the right shows Ayta Magbukon to lie at the edge defined by Denisovan ancestry. Admixture analysis of Philippine Negritos (**D**) together with the reference populations representing the least admixed East Asian or Australasian, Cordillerans and Papuans, respectively. The analysis was ran for 50 iterations, and for each K, the common modes of replicates were identified using CLUMPP. The major mode for each K was then plotted using Pong v1.4. Detection of East Asian-related ancestry in all Philippine Negritos using the test  $D(\text{Mbuti}; \text{EastAsian}, \text{Australasian}, X)$ , with Cordilleran Balangao as the surrogate for the least admixed East Asian and Papuan as the surrogate for the least admixed Australasian (**E**).

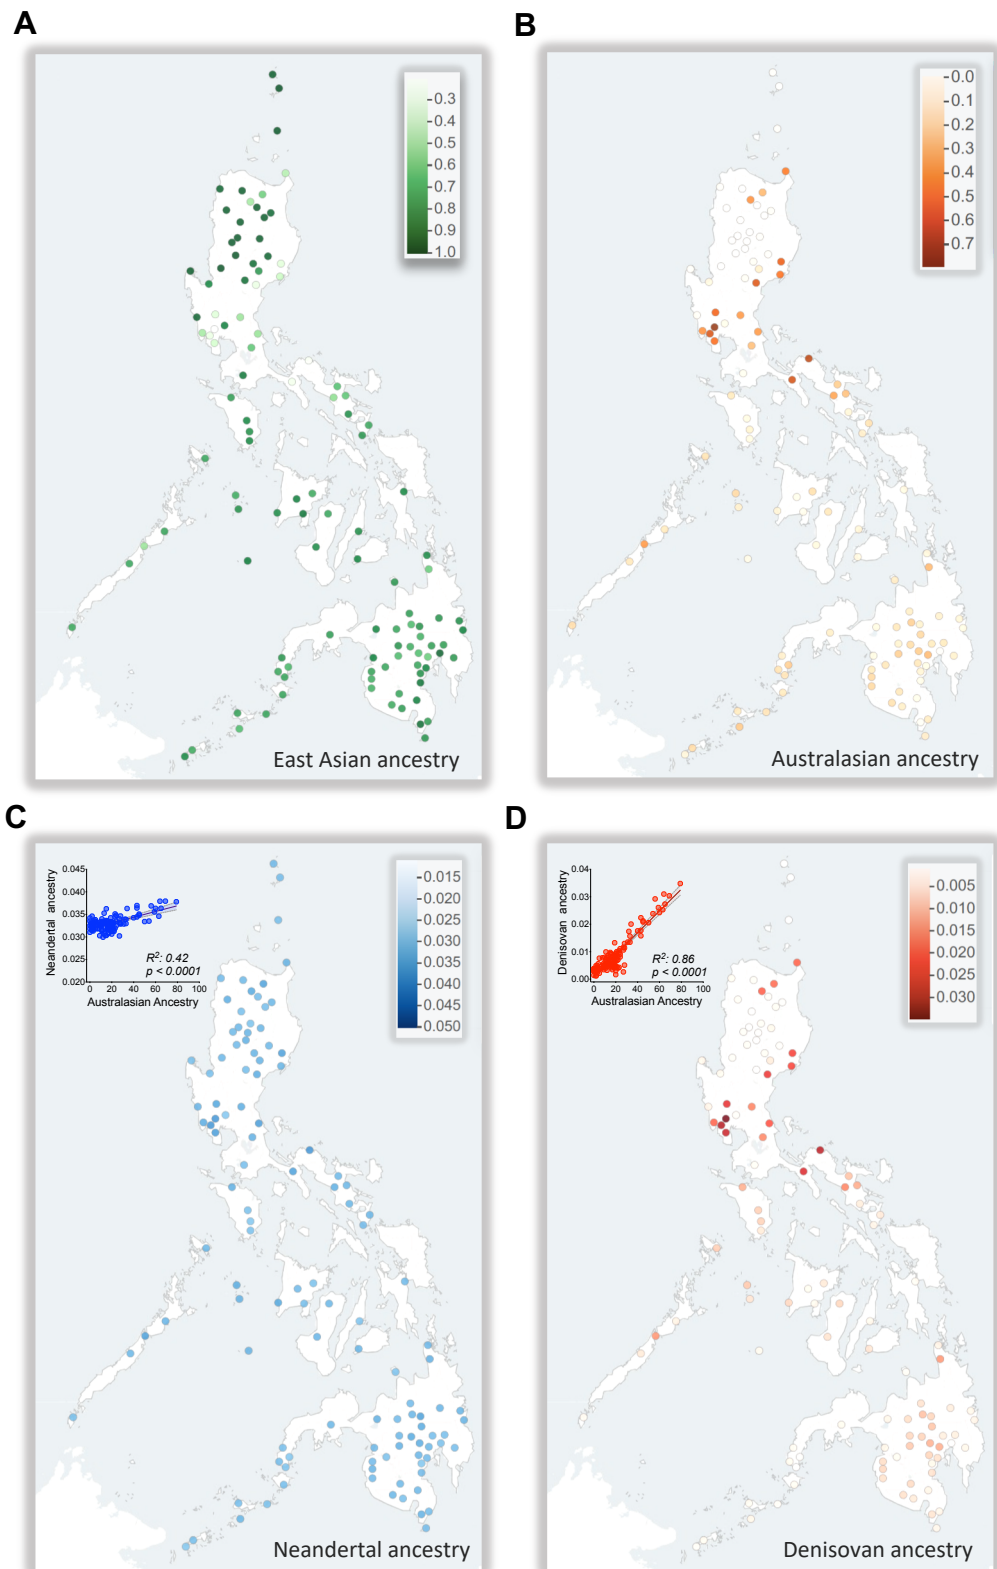

**Figure S3. Levels of Neanderthal, Denisovan, East Asian and Australasian-related ancestries among Philippine ethnic groups, Related to Figures 2 and 3.** Map of the Philippines showing the location of the populations with circular markers indicating their levels of East Asian (A) and Australasian (B), Neanderthal (C), and Denisovan (D) ancestry. Neanderthal ancestry and Denisovan ancestries are estimated by *f4-ratio* statistics, while East Asian and Australasian-related ancestries are estimated by qpAdm (see STAR Methods). An overlap between the distribution pattern of Australasian-related (B) and Denisovan (D) ancestry is observed, indicating correlation. Inset scatter plots (C,D) display stronger positive correlation between Australasian-related and Denisovan ancestry than between Australasian-related and Neanderthal ancestry ( $R^2$ : 0.86 vs 0.42, respectively).

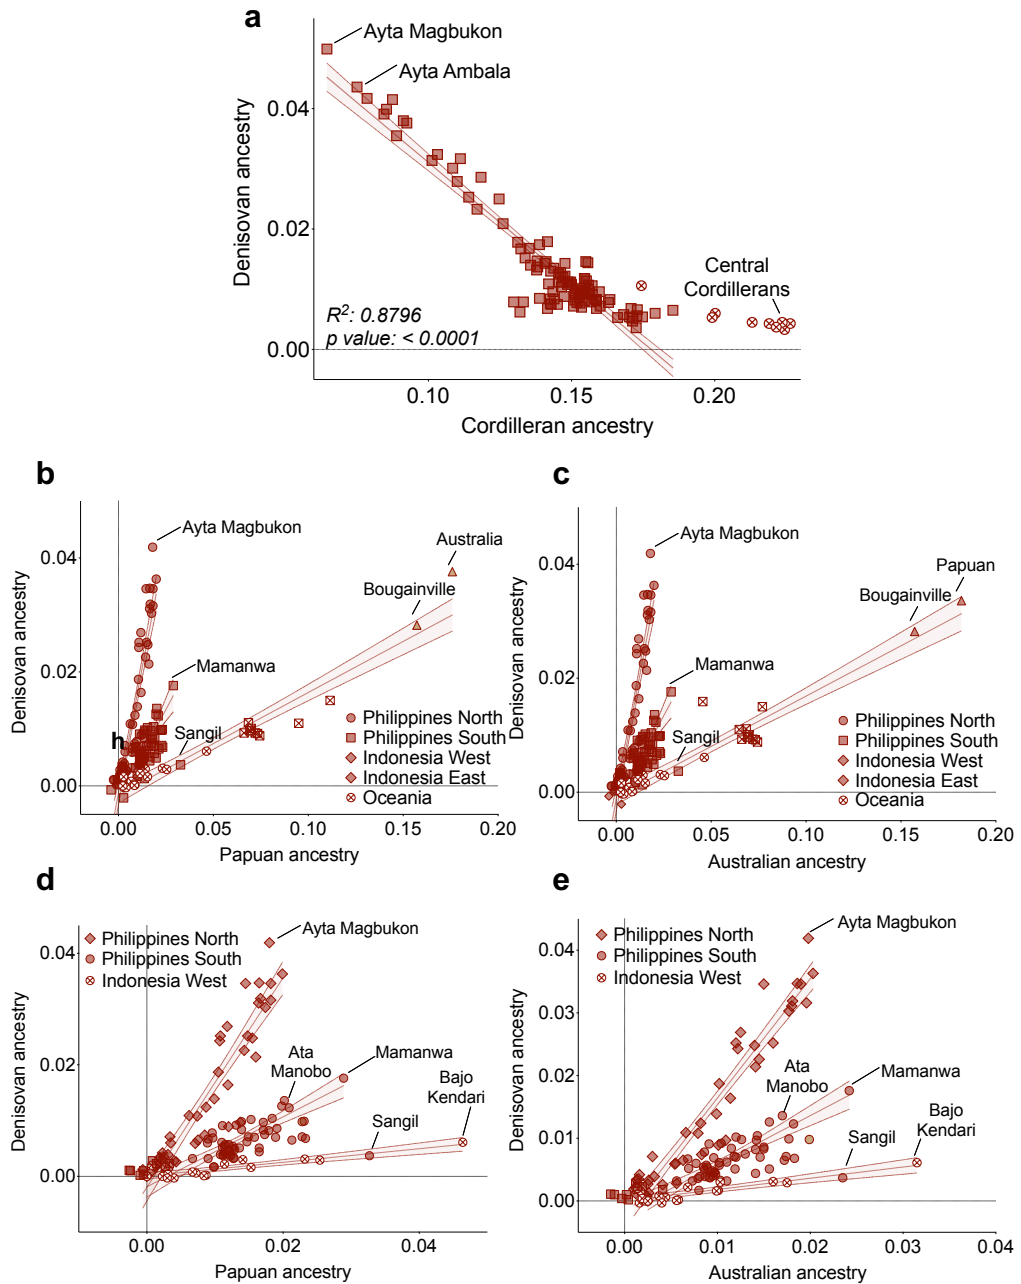

**Figure S4. Correlation between Denisovan and Australasian-related ancestry, Related to Figure 3.** Inverse correlation between Denisovan ancestry and East Asian/Cordilleran-related ancestry (A). Correlation between Denisovan ancestry and Papuan-related ancestry (B) or Australian-related ancestry (C) restricted to Philippine and western Indonesian populations, showing distinct slopes for Northern Negritos, Southern Negritos, and populations with Papuan-related ancestry. Correlation between Denisovan ancestry and Papuan-related ancestry (D) or Australian-related ancestry (E) of ISEA and Oceanian populations, showing distinct slopes for Northern Negritos, Southern Negritos, and populations with Papuan-related ancestry such as Sangil, eastern Indonesians, and Oceanians. Cordilleran ancestry is estimated by  $D(\text{Mbuti}; \text{Balangao}, \text{Papuan}, X)$ , Denisovan ancestry is estimated by  $D(\text{Mbuti}; \text{Denisovan}, \text{Balangao}, X)$ , and Papuan or Australian-related ancestries are estimated by  $D(\text{Mbuti}; \text{Australian}/\text{Papuan}, \text{Balangao}, X)$ .

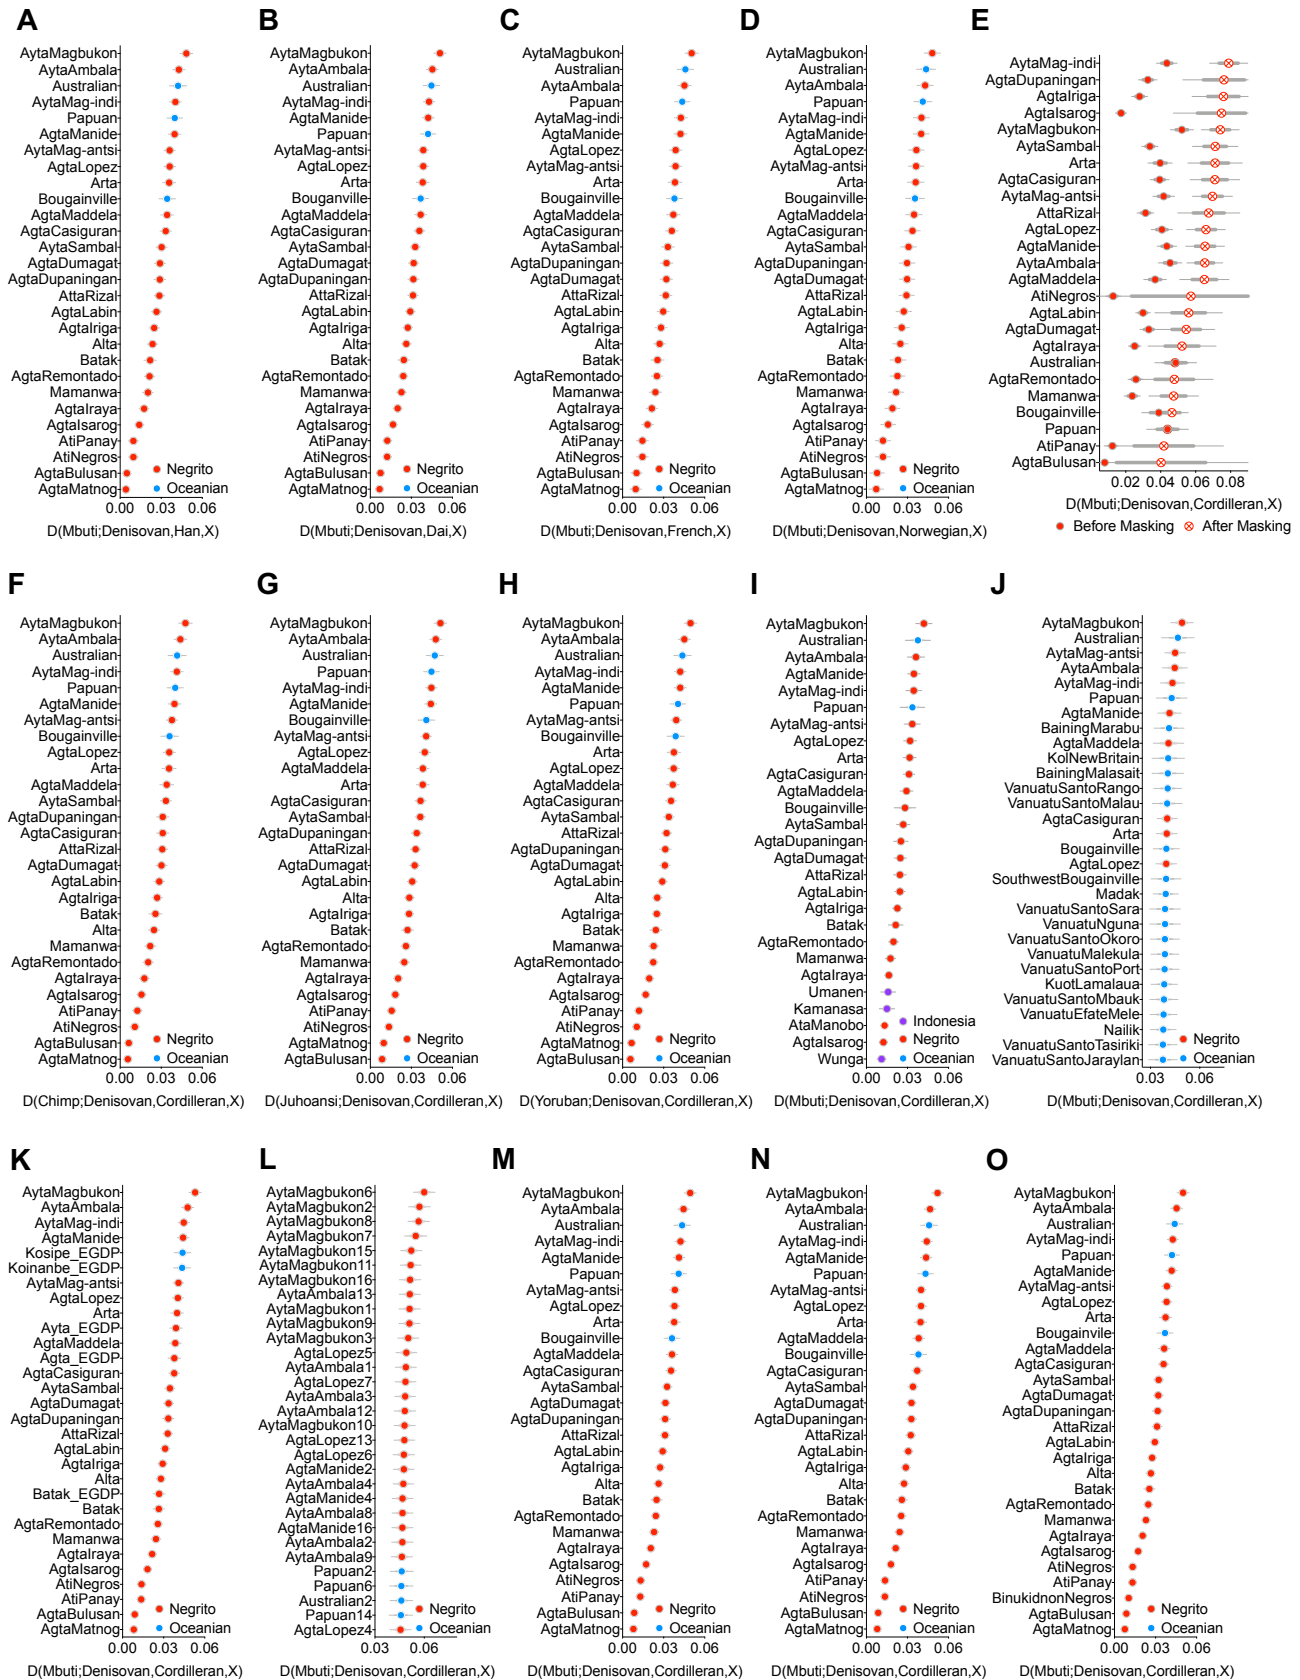

**Figure S5. Aya Magbukon exhibit the highest detectable level of Denisovan ancestry, Related to Figures 2 and 3.** Levels of Denisovan affinity among Asia-Pacific populations relative to (A) Han, (B) Dai, (C) French, (D) or Norwegian. Levels of Denisovan affinity accounting for admixture with East Asians (E). Levels of Denisovan affinity, using Phil\_1KGP\_SGDP\_1.92M dataset, among Asia-Pacific populations with (F) Chimp, (G) Juhoansi, or (H) Yoruba as an outgroup. Levels of Denisovan affinity using (I) Phil\_AsiaPacific\_315K, (J) Phil\_HO\_201K, or (K) Phil\_EGVP datasets. Using Phil\_1KGP\_SGDP\_1.92M dataset, levels of Denisovan affinity for individuals instead of populations (L), or for a restricted SNP panel that is ascertained for (M) European, (N) African populations, or (O) H3Africa SNP panel. Thick and thin error bars represent 1 and 1.96 standard error of the estimate, respectively.

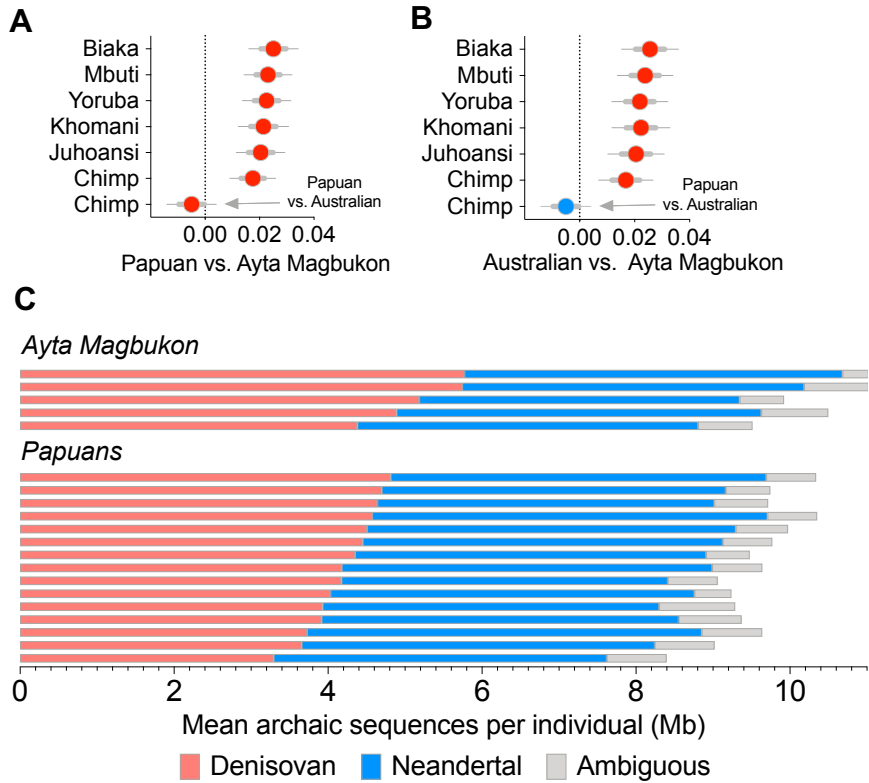

**Figure S6. Analysis of sequence data confirm higher levels of Denisovan ancestry in Ayta Magbukon, Related to Figures 4 and 5.** Direct comparison of Denisovan ancestry between AustraloPapuans and Ayta Magbukon, using the statistic  $D(\text{Outgroup}; \text{Denisovan}, X, \text{AytaMagbukon})$ , with Chimp or various African groups used as an outgroup (A,B) (all comparisons between Papuans or Australians vs. Ayta Magbukon have a Z score > 3). Average amounts of introgressed Denisovan, Neandertal, or ambiguous sequences detected per individual by the S' approach (C) (see STAR Methods).

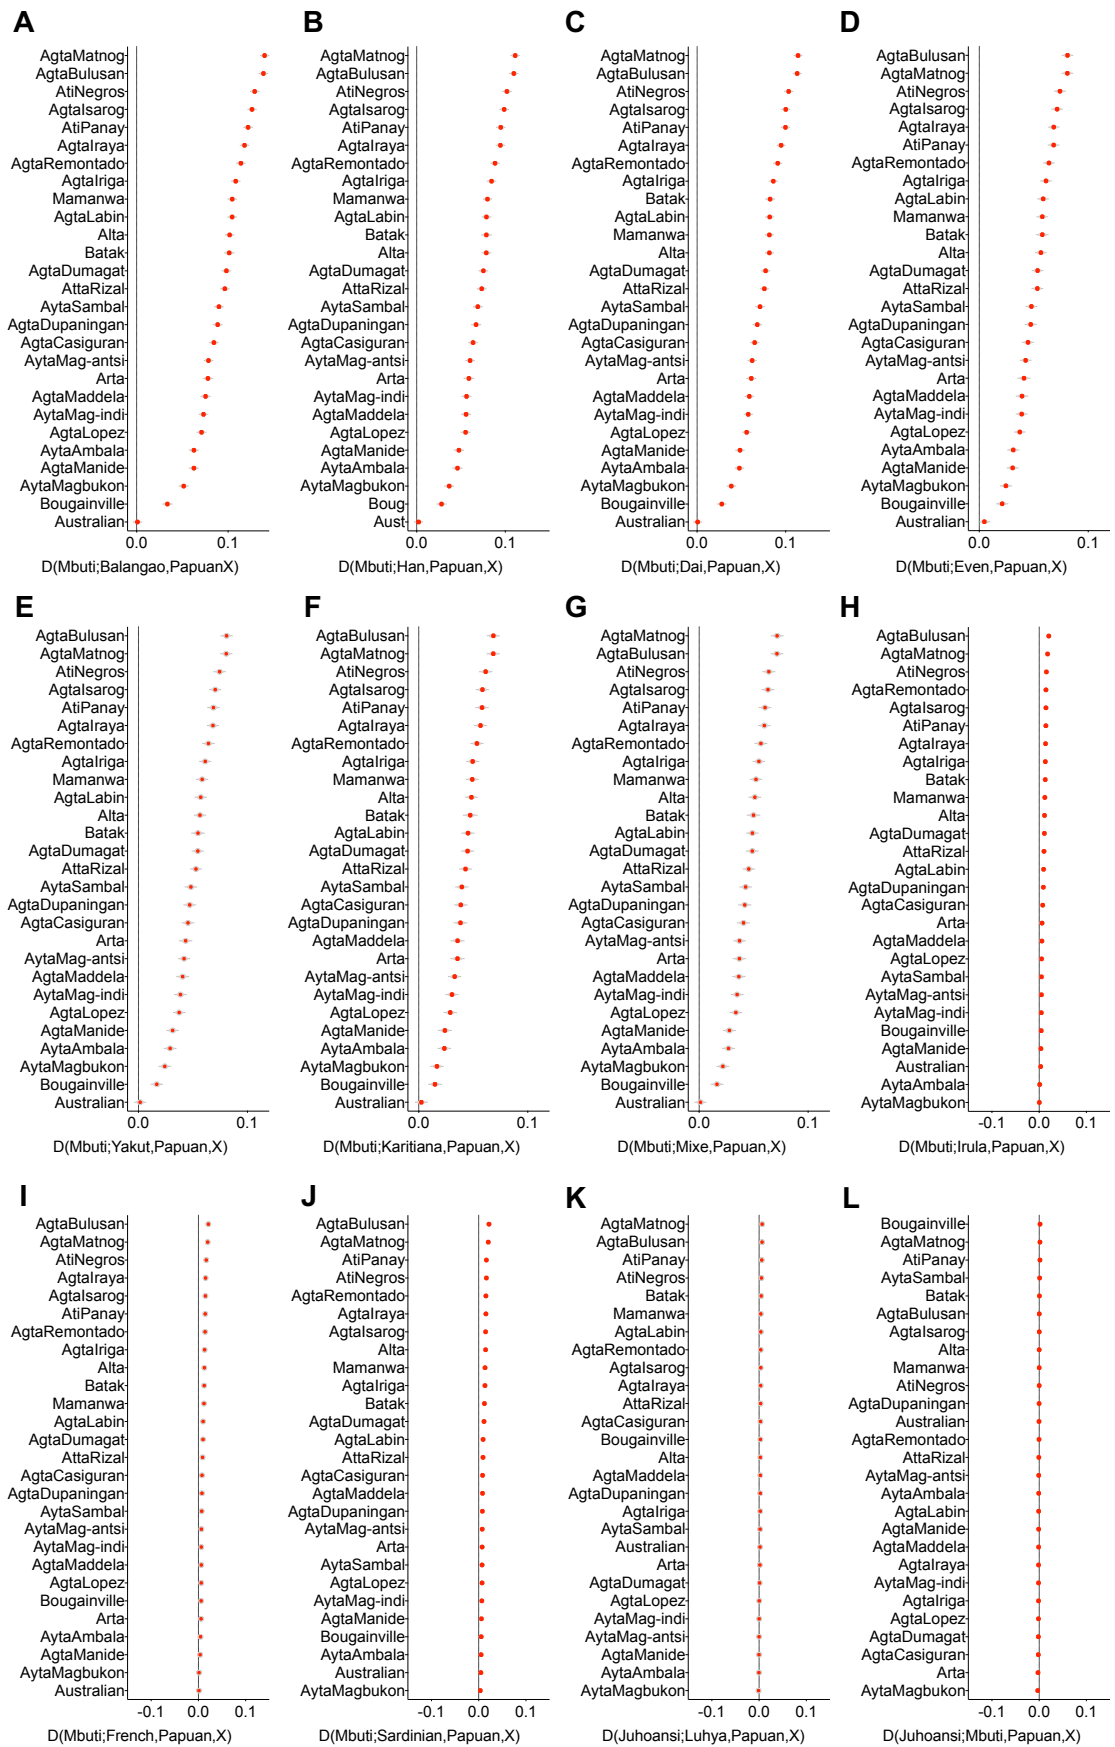

**Figure S7. Presence of East Asian gene flow into Philippine Negritos, Related to Figures 4 and 7.** Direct comparisons between Papuans and Philippine Negritos to assess the presence of gene flow from an East Asian (A-C), Siberian (F,E), Native American (F,G), South Asian (H), European (I,J), or African (K,L) source population. Thick and thin error bars represent 1 and 1.96 standard error of the estimate, respectively.



| <b>Parameters (all models)</b>                  |                       |
|-------------------------------------------------|-----------------------|
| Length simulated sequence                       | 100M                  |
| Samples per population                          | 10                    |
| Mutation rate                                   | $1.25 \times 10^{-8}$ |
| Recombination rate                              | $1.25 \times 10^{-8}$ |
| Generation time                                 | 25 years              |
| Papuan - Ayta split                             | 46 kya                |
| East Asian -Ayta split                          | 50 kya                |
| European - Ayta split                           | 55 kya                |
| African – non-African split                     | 70 kya                |
| Denisovan 1 – Denisovan 0 split                 | 200 kya               |
| Denisovan 2 – Denisovan 0 split                 | 200 kya               |
| Denisovan 0 – Denisovan (Altai) split           | 300 kya               |
| Neanderthal – Denisovan (Altai) split           | 400 kya               |
| Denisovan (Altai) – African split               | 600 kya               |
| African – Chimp split                           | 4 mya                 |
| Time of sampling (Neanderthal)                  | 60 kya                |
| Time of sampling (Denisovan (Altai))            | 40 kya                |
| Time of sampling (all other pops)               | Present               |
| Pop size Denisovan 0/1/2/Altai                  | 1500                  |
| Pop size Neanderthal                            | 2000                  |
| Pop size African                                | 15000                 |
| Pop size non-African (initial)                  | 5000                  |
| Pop size non-Africans (bottleneck 60kya-70kya)  | 2000                  |
| Pop size East Asian                             | 3500                  |
| Pop size Papuan                                 | 3500                  |
| Pop size Ayta                                   | 3500                  |
| Pop size Chimp                                  | 30000                 |
| Admixture time / prop Neanderthal - non-African | 68 kya / 0.02         |
| Admixture time / prop East Asian - Ayta         | 2500 / 0.1            |

**Table S1. Fixed parameters for all simulation models, Related to Figure 7.**

| <b>Parameters</b>                                             | <b>Models</b>    |                  |                  |                  |                  |
|---------------------------------------------------------------|------------------|------------------|------------------|------------------|------------------|
|                                                               | <b>NULL</b>      | <b>ALT1</b>      | <b>ALT2</b>      | <b>ALT3</b>      | <b>ALT4</b>      |
| Admix time / proportion<br>Denisovan 1 – ancestor Ayta/Papuan | 48 kya /<br>0.04 | 48 kya /<br>0.04 | -                | -                | -                |
| Admix time / proportion<br>Denisovan 2 – Ayta                 | -                | 40 kya /<br>0.02 | 35 kya /<br>0.06 | 35 kya /<br>0.06 | 25 kya /<br>0.06 |
| Admix time / proportion<br>Denisovan 1 – Papuan               | -                | -                | 45 kya /<br>0.04 | 25 kya /<br>0.04 | 25 kya /<br>0.04 |

**Table S2. Variable parameters for simulation models, related to Figure 7.**
